# Supplementary material for: Comparison of Bioactive Secondary Metabolites and Cytotoxicity of Extracts from Inonotus obliquus Isolates from Different Host Species
Source: MDPI journal article supplement (doi:10.3390/molecules28134907), 2023-06-22
Supplement: s1 [file s1]

## Comparison of bioactive secondary metabolites and cytotoxicity of extracts from *Inonotus obliquus* isolates from different host species

### Additional data on the cytotoxicity of extracts

**Table S1.** Results of cytotoxicity evaluation of 30am in concentration range of 0.0125 - 0.2 mg/mL. The viability was determined using MTT assay. Each experiment was repeated in triplicate. The results represent the number of viable cells expressed as a percent of the control  $\pm$  SD

| Concentration<br>[mg/mL] | HaCaT     |      | BJ        |      | B16F10    |       | A375      |      | HepG2     |      |
|--------------------------|-----------|------|-----------|------|-----------|-------|-----------|------|-----------|------|
|                          | viability | SD   | viability | SD   | viability | SD    | viability | SD   | viability | SD   |
| 0.0125                   | 102.46    | 2.03 | 106.91    | 4.68 | 104.72    | 4.28  | 93.49     | 4.31 | 90.44     | 5.94 |
| 0.025                    | 103.34    | 7.24 | 93.62     | 4.82 | 93.17     | 5.03  | 94.76     | 4.37 | 100.81    | 4.58 |
| 0.05                     | 96.13     | 4.80 | 103.81    | 6.97 | 96.45     | 5.46  | 95.03     | 2.89 | 100.32    | 1.49 |
| 0.1                      | 90.36     | 3.67 | 86.43     | 4.38 | 65.49     | 13.40 | 92.13     | 3.08 | 103.34    | 1.48 |
| 0.2                      | 101.59    | 4.45 | 84.65     | 5.66 | 62.32     | 6.02  | 87.52     | 1.65 | 108.53    | 6.21 |

**Table S2.** Results of cytotoxicity evaluation of 43am in concentration range of 0.0125 - 0.2 mg/mL. The viability was determined using MTT assay. Each experiment was repeated in triplicate. Results represent the number of viable cells expressed as percent of control  $\pm$  SD

| Concentration<br>[mg/mL] | HaCaT     |      | BJ        |      | B16F10    |       | A375      |      | HepG2     |      |
|--------------------------|-----------|------|-----------|------|-----------|-------|-----------|------|-----------|------|
|                          | viability | SD   | viability | SD   | viability | SD    | viability | SD   | viability | SD   |
| 0.0125                   | 105.66    | 2.67 | 94.90     | 4.70 | 102.33    | 9.00  | 104.41    | 0.76 | 93.93     | 1.26 |
| 0.025                    | 94.99     | 1.84 | 96.59     | 2.49 | 103.73    | 5.21  | 101.30    | 2.86 | 102.24    | 4.78 |
| 0.05                     | 102.98    | 2.96 | 92.07     | 2.63 | 109.98    | 14.52 | 97.16     | 4.25 | 101.07    | 2.97 |
| 0.1                      | 97.36     | 5.51 | 92.83     | 2.52 | 105.28    | 14.37 | 99.44     | 2.63 | 108.64    | 5.22 |
| 0.2                      | 104.03    | 6.49 | 92.86     | 2.24 | 61.90     | 10.20 | 94.28     | 0.98 | 102.24    | 2.92 |
